# Supplementary material for: CXCR4/SDF1 signalling promotes sensory neuron clustering in vitro
Source: PubMed Central journal article supplement (PMC6176946; doi:10.1242/bio.035568), 2018-08-22
Supplement: biolopen-7-035568-s1.pdf [file biolopen-7-035568-s1.pdf]

## Supplementary

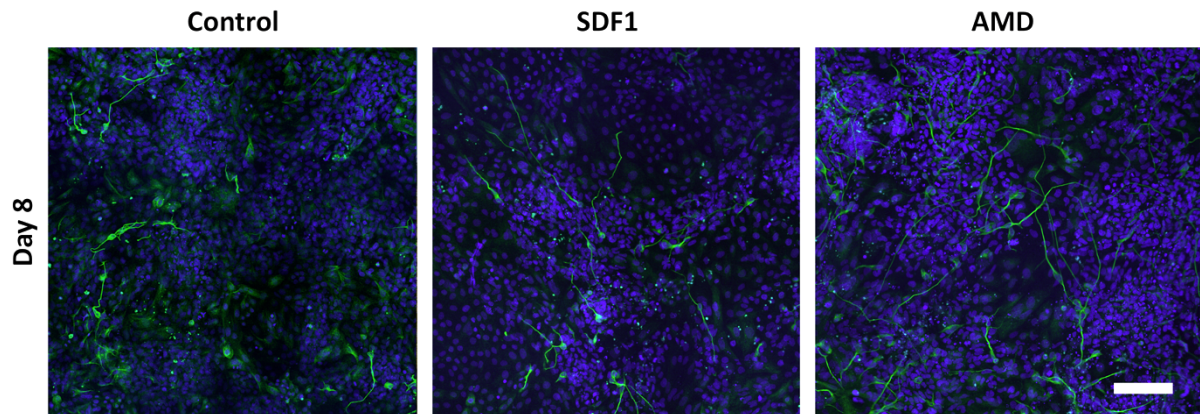

**Figure S1** – shows day 8 of the sensory neuron differentiation protocol for the three groups: control, SDF1 and AMD3100. Cultures stained for beta-3-tubulin (green) and exhibit a similar onset point of terminal differentiation, whereas nuclear staining (blue, Hoechst) reveal comparable cell densities across groups. Scale bar: 150 $\mu$ m.

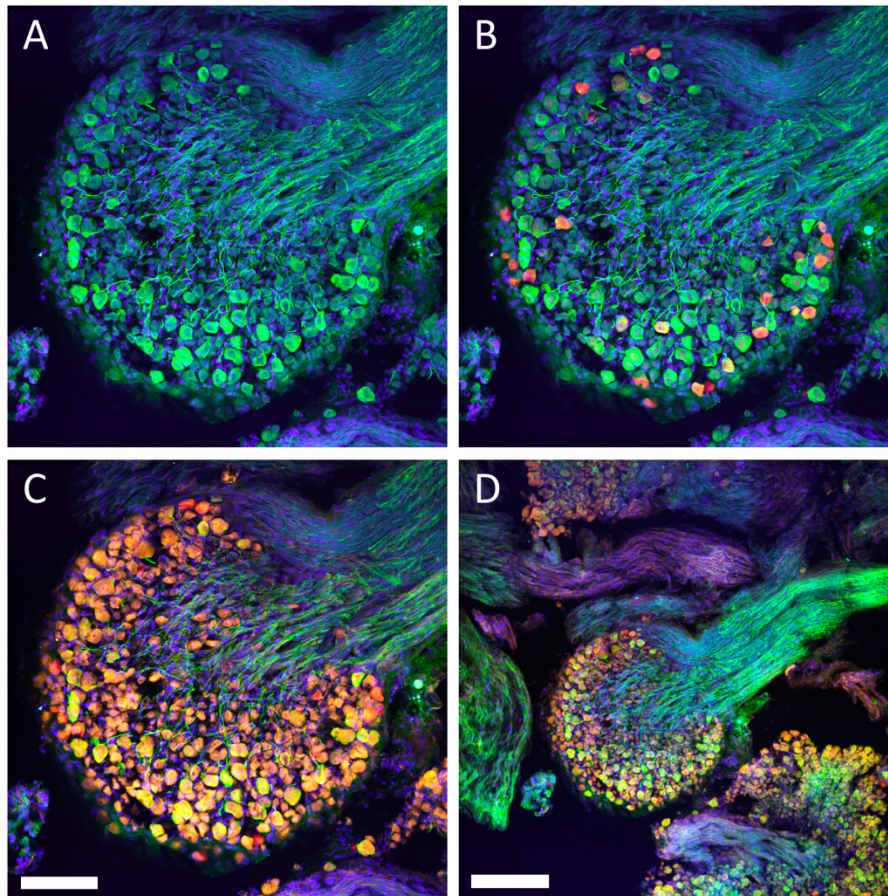

**Figure S2** – shows immunostaining antibody positive control. Cryosectioned (50 $\mu$ m) post-natal day 6 mouse DRG immunostained against beta-III-tubulin (green), TrkA (yellow) and TrkB (red), with nuclei stained blue using hoechst. A) Hoechst + beta-III-tubulin (20x obj.) B) Hoechst + beta-III-tubulin + TrkB (20x obj.) C) Hoechst + beta-III-tubulin + TrkB + TrkA (20x obj. – Scale bar: 150 $\mu$ m) D) Hoechst + beta-III-tubulin + TrkB + TrkA (10x obj. – Scale bar: 300 $\mu$ m).

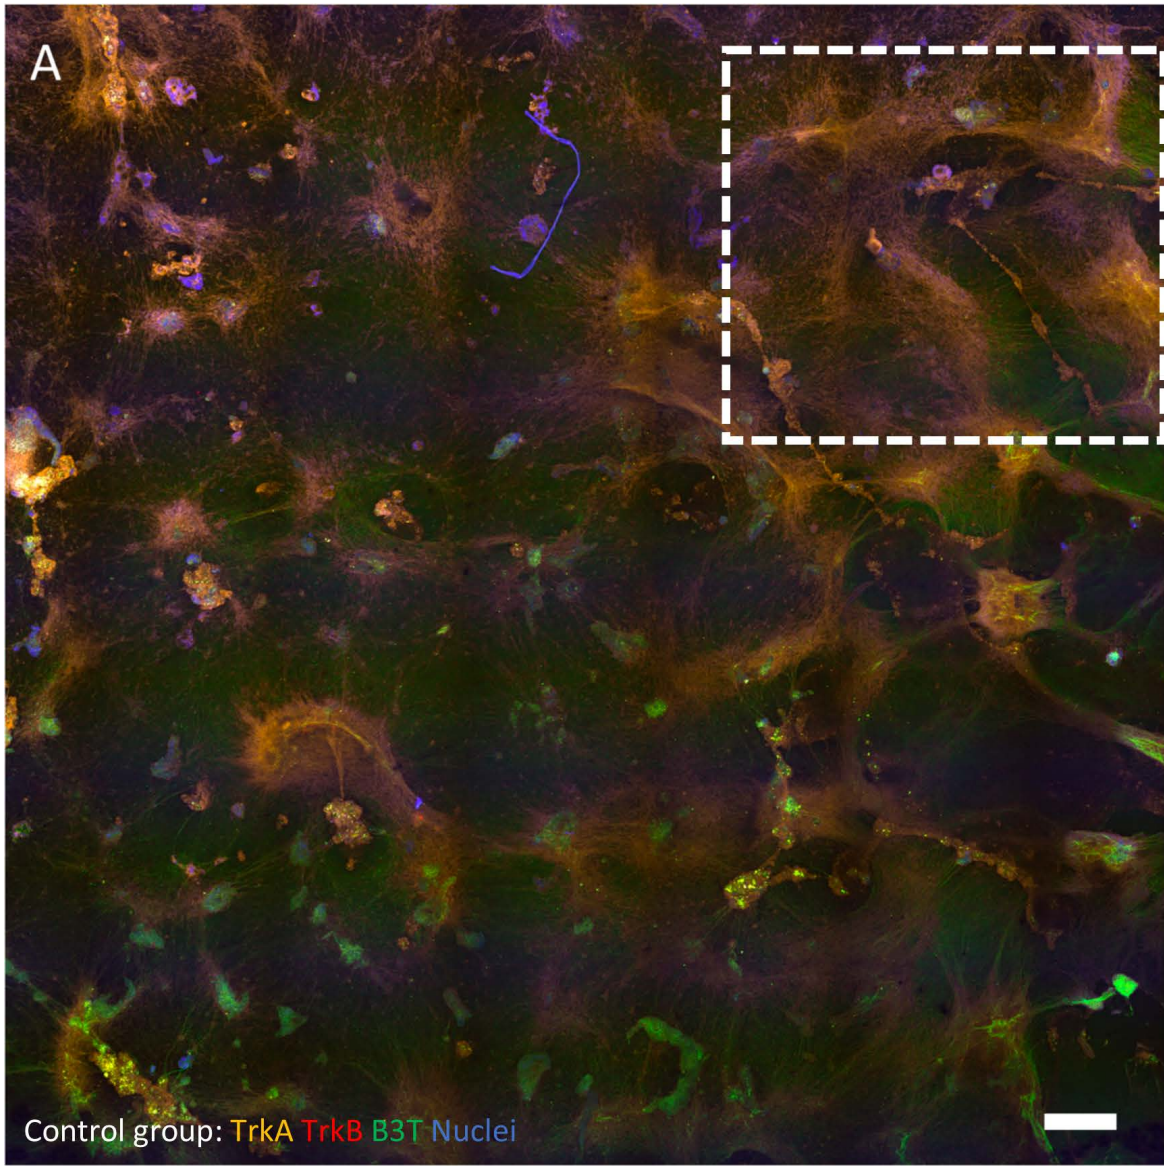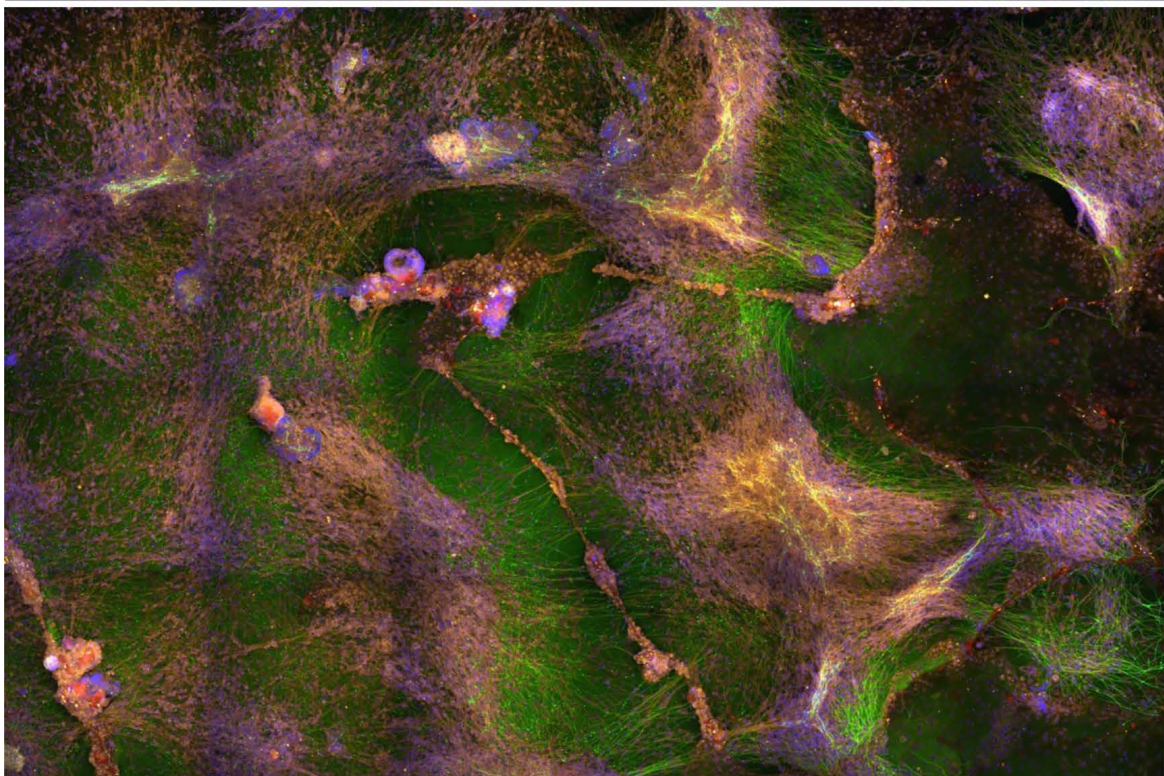

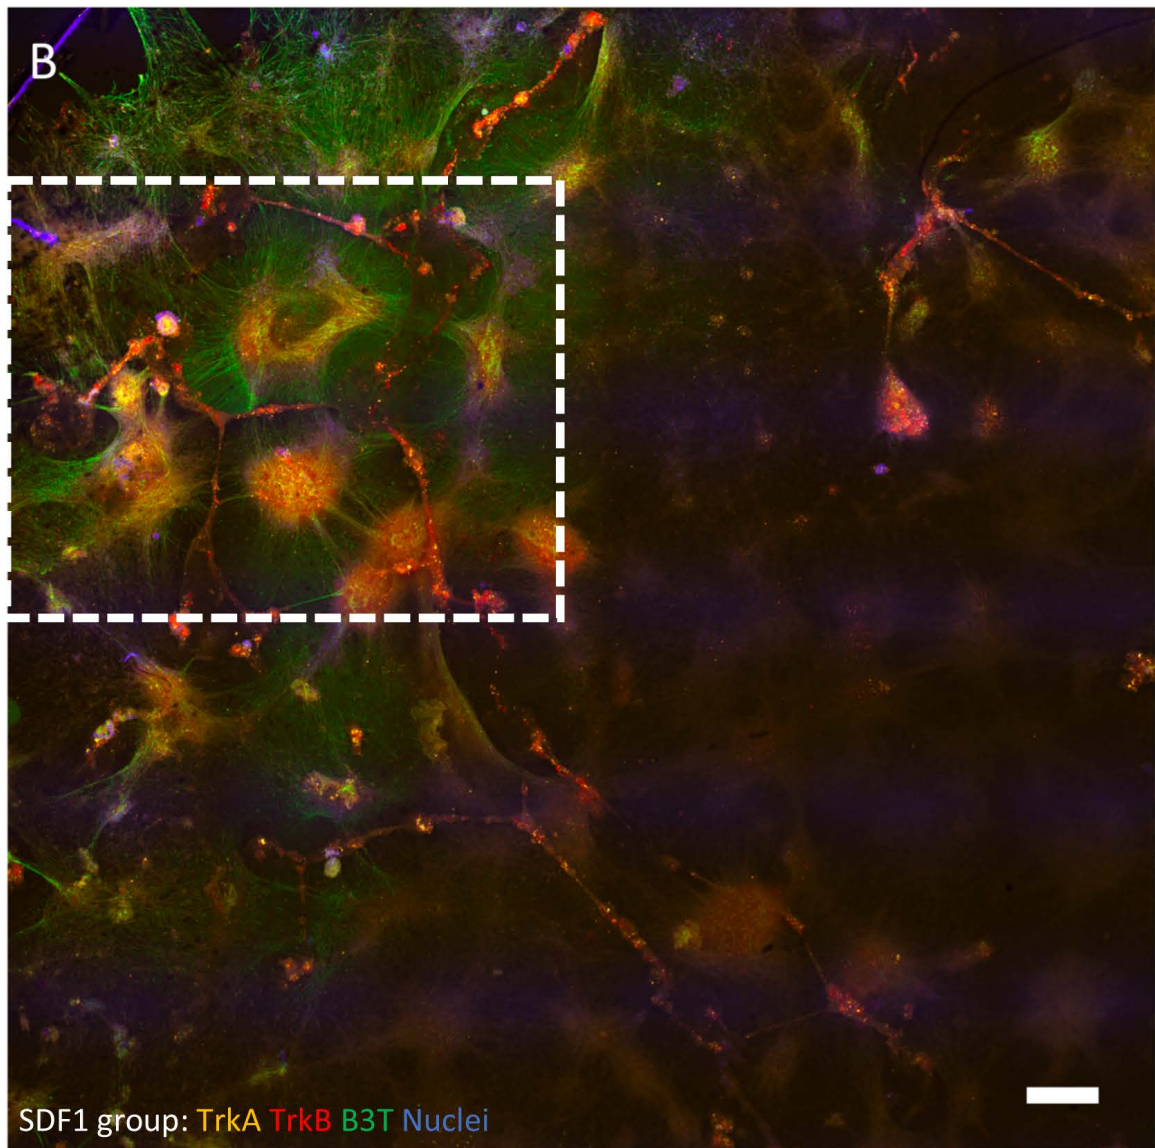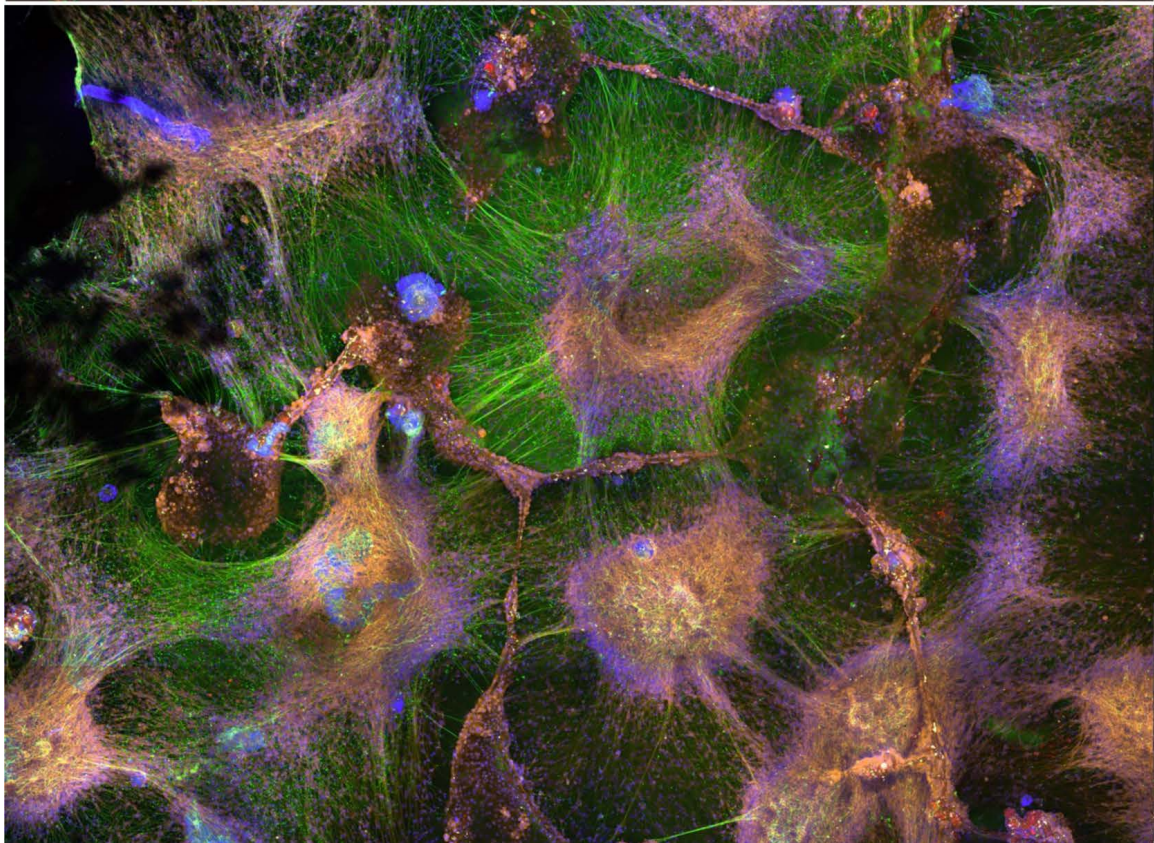

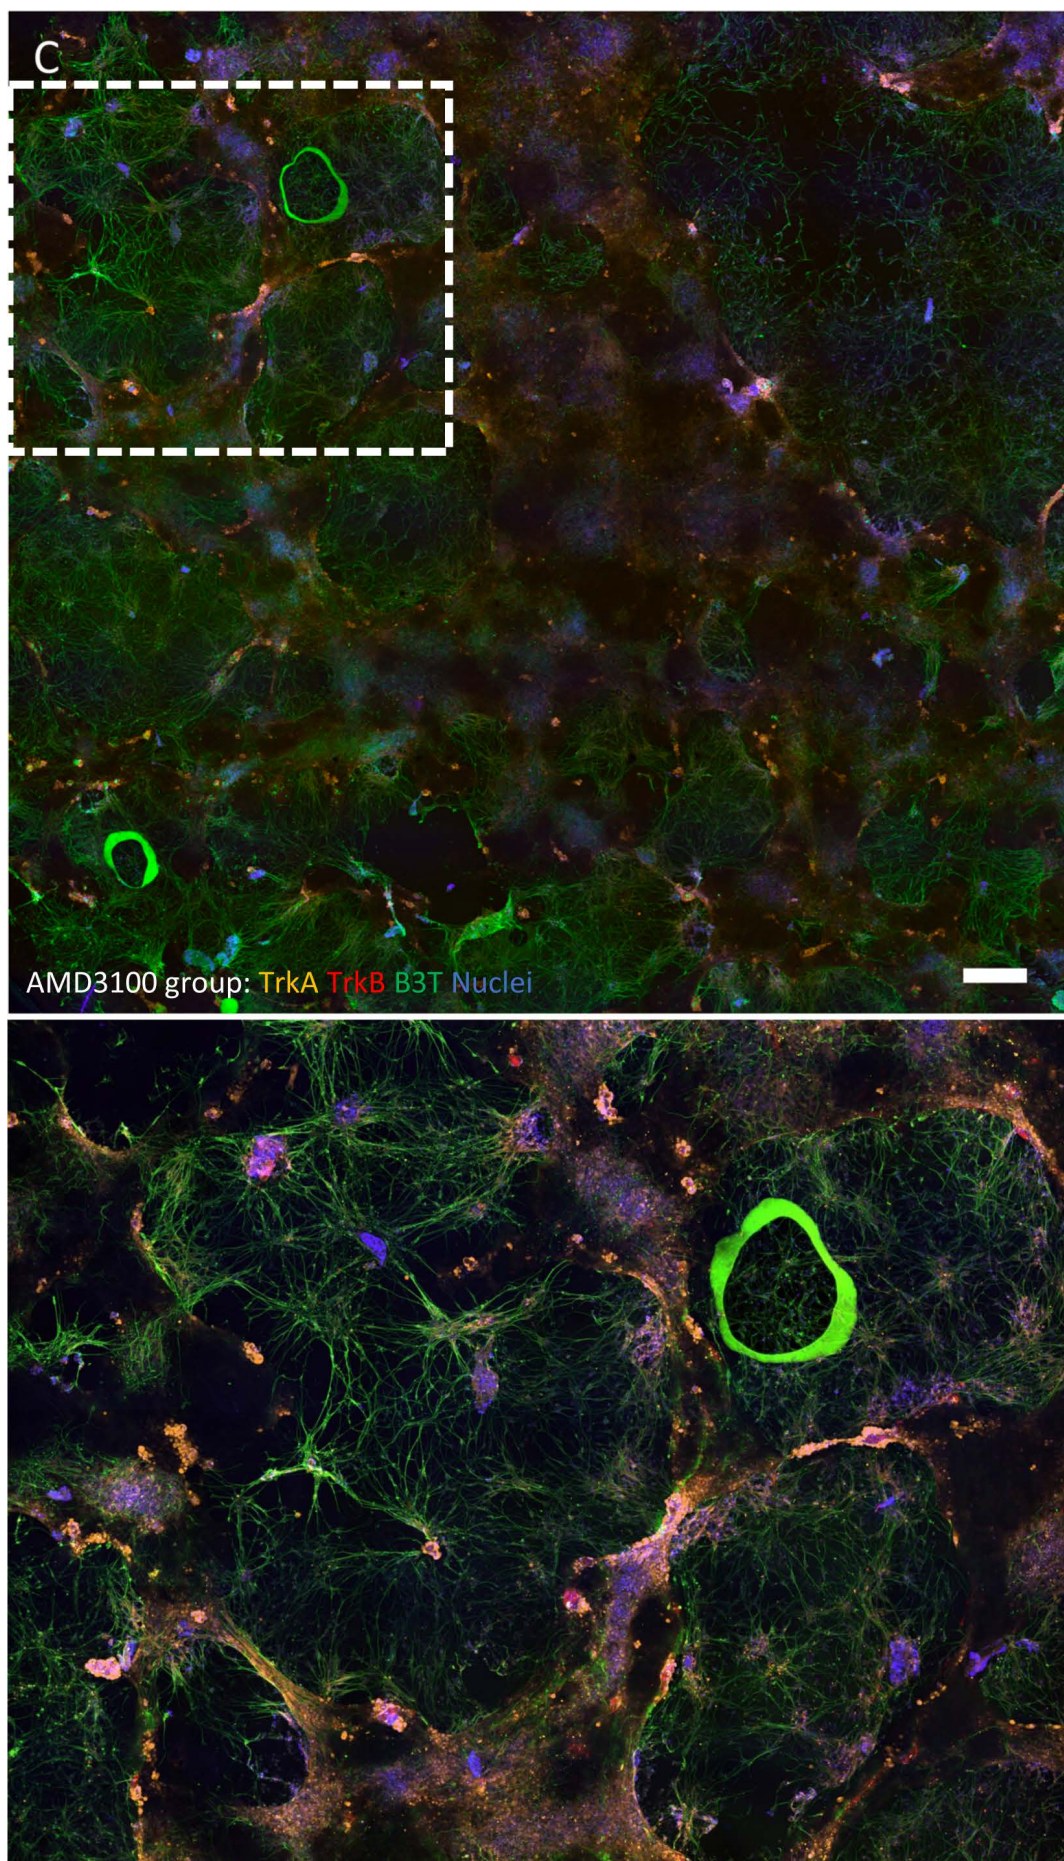

**Figure S3** – Large-format image scans of cultures from the three differentiation groups. Upper image: 6x6 scan using the 10x objective, lower image: 6x4 scan of the outlined area using a 20x objective. A) Control B) SDF1 C) AMD3100 each stained against beta-III-tubulin (green), TrkA (yellow), TrkB (red) and nuclei (blue). See Fig. S4 for separate colour channels. Scale bars: 400µm

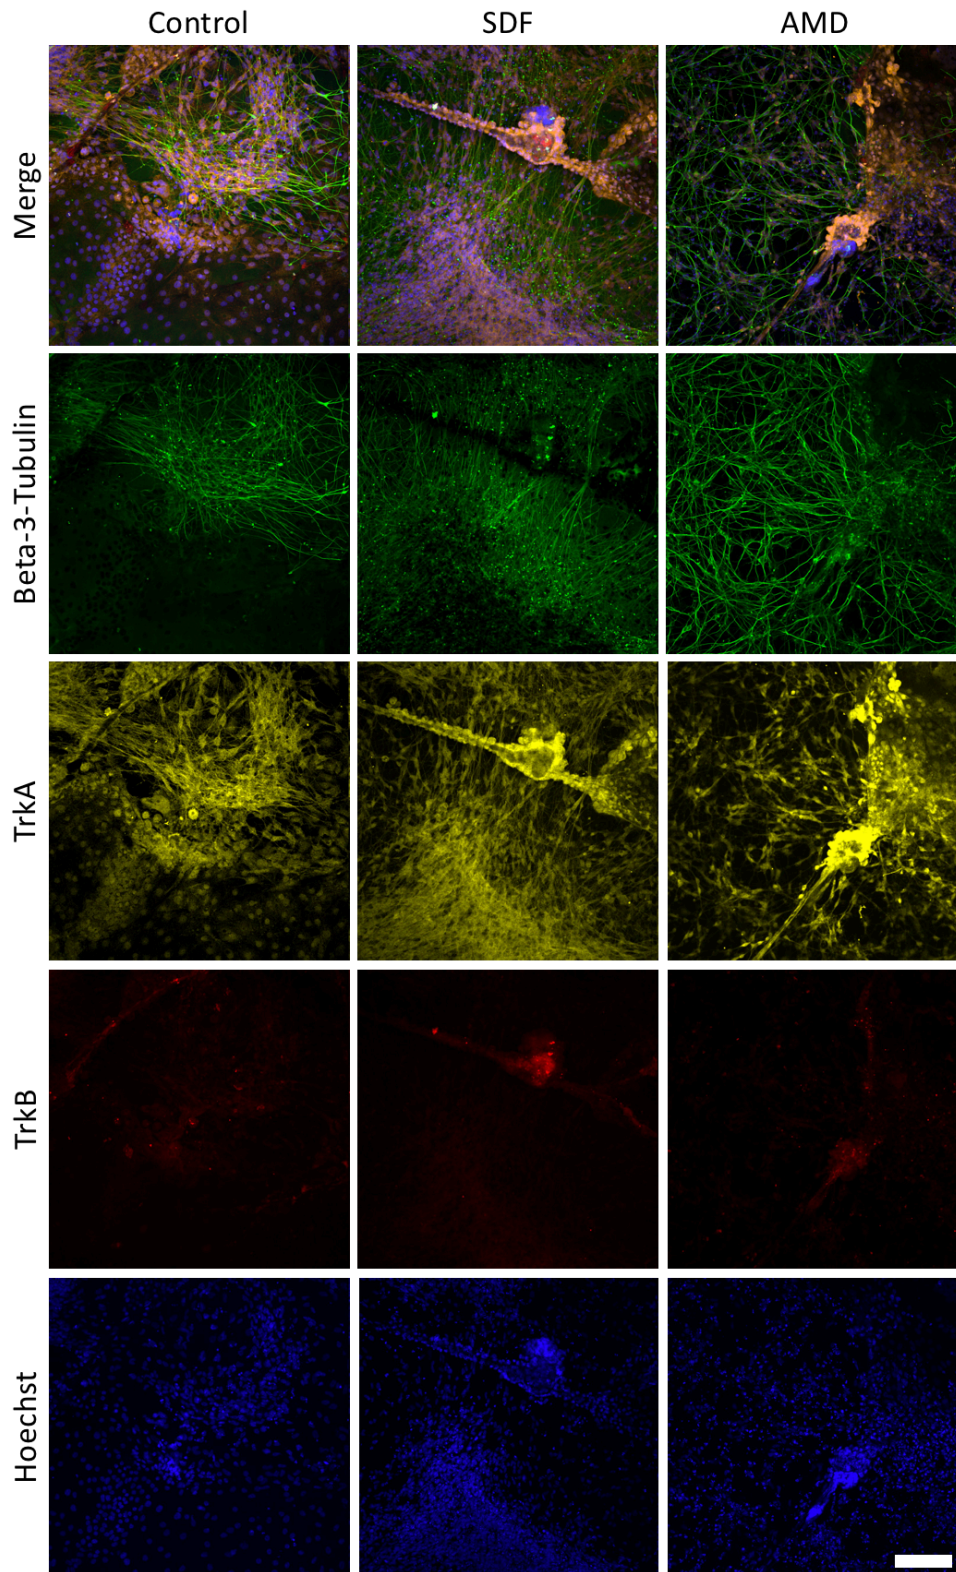

**Figure S4** – shows individual colour channels of the three culture groups (control, SDF, and AMD) stained for beta-3-tubulin (green), TrkA (yellow), TrkB (red) and nuclear staining (blue). Scale bar: 150 $\mu$ m

Table S1

| Gene name | Primer sequence         |
|-----------|-------------------------|
| GAPDH-F   | ATGACATCAAGAAGGTGGTG    |
| GAPDH-R   | CATACCAGGAAATGAGCTTG    |
| Otx2-F    | GACCCGGTACCCAGACATC     |
| Otx2-R    | TGGCCACTTGTTCCACTCTC    |
| Nanog-F   | ATTCTTCCACCAGTCCCAA     |
| Nanog-R   | ATCTGCTGGAGGCTGAGGTA    |
| PAX7-F    | GACGACGGCGAAAAGAAGG     |
| PAX7-R    | GTAGTGGGTCCTCTCAAAGGC   |
| SOX10-F   | CCTCACAGATCGCCTACACC    |
| SOX10-R   | CATATAGGAGAAGGCCGAGTAGA |
| TFAP2A-F  | GACCTCTCGATCCACTCCTTAC  |
| TFAP2A-R  | GAGACGGCATTGCTGTTGGACT  |
| FoxG1-F   | AGAAGAACGGCAAGTACGAGA   |
| FoxG1-R   | TGTTGAGGGACAGATTGTGGC   |
| Pax6-F    | TCTTTGCTTGGGAAATCCG     |
| Pax6-R    | CTGCCCGTTCAACATCCTTAG   |
| SOX7-F    | ACGCCGAGCTCAGCAAGAT     |
| SOX7-R    | TCCACGTACGGCCTCTTCTG    |
| PCDH1-F   | GACTCTTCCAGATTGGGTACAT  |
| PCDH1-R   | CTTGCCGCGGTCACTGA       |
| Cad7-F    | GCTACCCAGGTTGGGAATATC   |
| Cad7-R    | CTCTCCAAGTCTGTGTTTCTGT  |
| Cad11-F   | AGAGGTCCAATGTGGGAACG    |
| Cad11-R   | GGTTGTCCTTCGAGGATACTGT  |
| L1CAM-F   | GGCATTGAAATCCTCAACTCAAG |
| L1CAM-R   | TATGTCTCTTGCTGTGCTTCC   |
| TrkA-F    | TTTGGCATGAGCAGGGATATC   |
| TrkA-R    | GTCGCTCTCGGTGGTGAAC     |
| TrkB-F    | ACTTCGTGCACCGCGATT      |
| TrkB-R    | CGAATGGGCAGCATTGTGT     |
| CXCR4-F   | AGCAGGTAGCAAAGTGACG     |
| CXCR4-R   | CCTCGGTGTAGTTATCTGAAGTG |
| P2X3-F    | CCGCTGCGTGAACTACAG      |
| P2X3-R    | GTGAAGTTCTCAGCTTCCATCA  |
| SDF1-F    | GAGCCAACGTCAAGCATCTCA   |
| SDF1-R    | CGGGTCAATGCACACTTGTCTA  |
| GFAP-F    | CATGAAGCCGAAGAGTGGT     |
| GFAP-R    | TCGTTGGCTTCGTGCTT       |
| NF-H-F    | GACCTGCTCAACGTCAAGAT    |
| NF-H-R    | GGGAGTCCTTCAGTAAGAGAGA  |

**Table S2**

| <b>Antibody + origin</b> | <b>Product details + applied dilution in PBS</b> |
|--------------------------|--------------------------------------------------|
| TrkA Rabbit              | SAB1305370, Sigma-Aldrich, 1:100                 |
| TrkB Goat                | T1941, Sigma-Aldrich, 1:100                      |
| Beta-III-tubulin mouse   | T8660, Sigma-Aldrich, 1:2000                     |
